# Supplementary material for: A genome-wide microRNA profiling indicates miR-424-5p and miR-503-5p as regulators of ALK expression in neuroblastoma
Source: PubMed Central journal article supplement (PMC5593579; doi:10.18632/oncotarget.17033), 2017-04-11
Supplement: oncotarget-08-56518-s001.pdf [file oncotarget-08-56518-s001.pdf]

# A genome-wide microRNA profiling indicates miR-424-5p and miR-503-5p as regulators of ALK expression in neuroblastoma

## SUPPLEMENTARY FIGURES AND TABLES

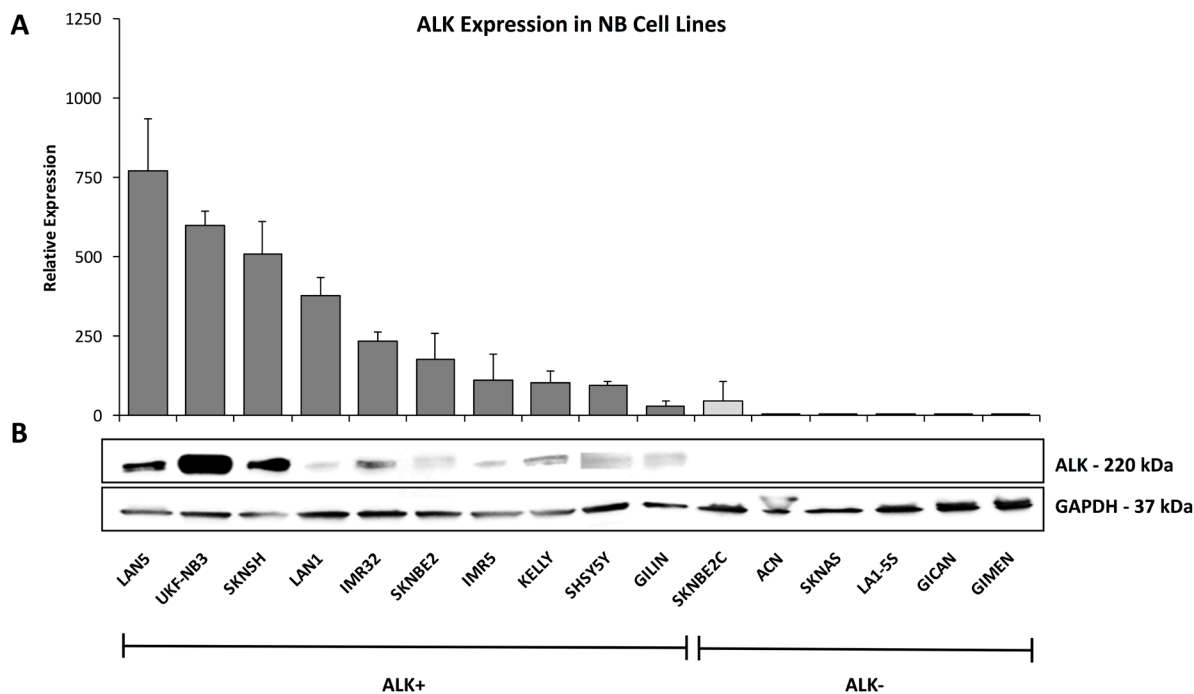

**Supplementary Figure 1: Analysis of ALK expression and definition of ALK+ and ALK- subgroups in NB cell lines.** *ALK* mRNA expression was performed by qPCR (A) and ALK protein detected by western blot (B). Numbers in the Y-axis represents the fold change in expression with respect to the less expressed sample, which was set as 1.

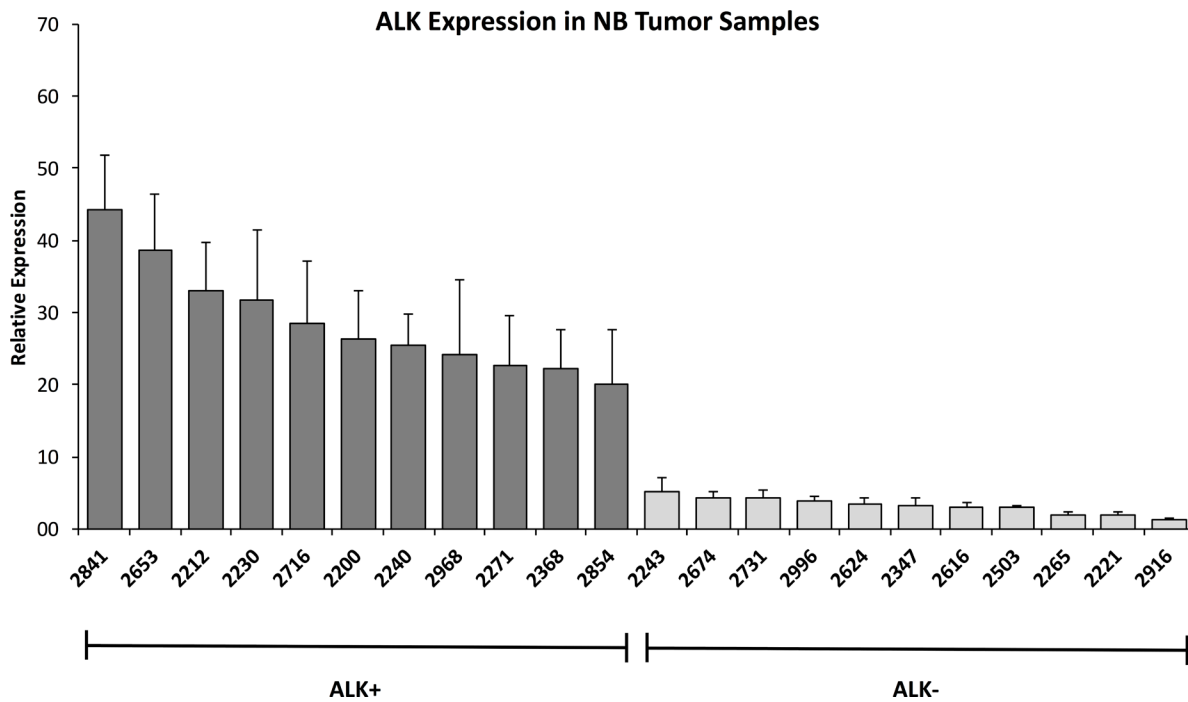

**Supplementary Figure 2: Analysis of ALK expression and definition of ALK+ and ALK- subgroups in NB tumor samples.** *ALK* mRNA expression was performed by qPCR. Numbers in the Y-axis represents the fold change in expression with respect to the less expressed sample, which was set as 1.

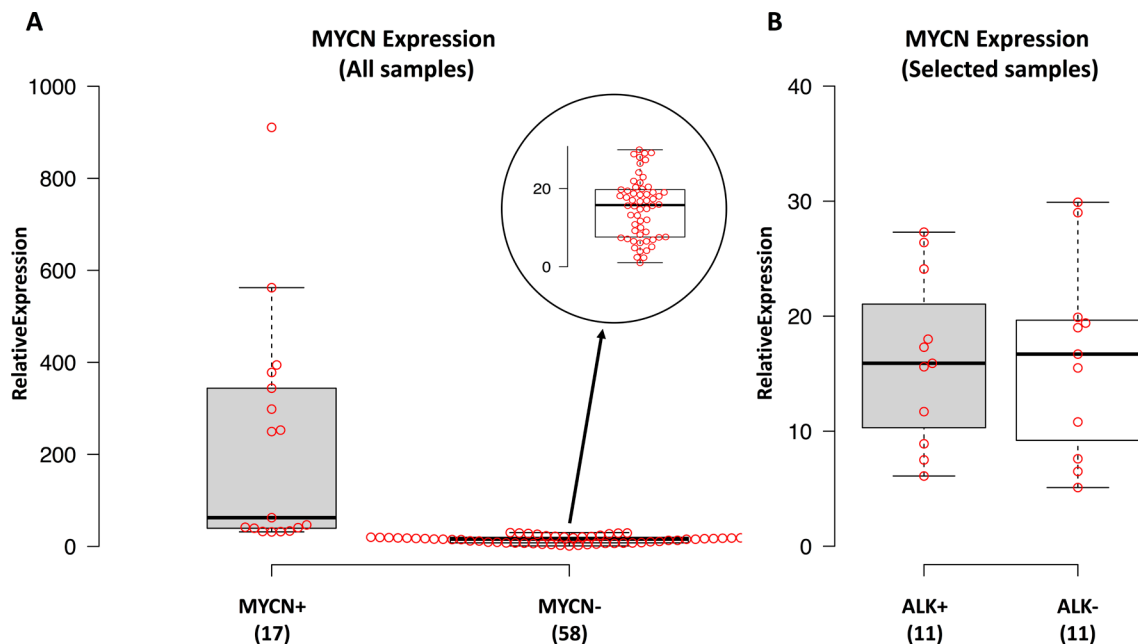

**Supplementary Figure 3: MYCN expression in NB tumor samples.** MYCN mRNA expression was performed by qPCR and data box-plotted using BoxPlotR. Numbers in the Y-axis represents the fold change in expression with respect to the less expressed sample, which was set as 1. **(A)** Seventeen samples that were either MYCN amplified or with high MYCN expression were discarded from miRNAs expression analysis. **(B)** Of the 58 samples with MYCN single copy and low MYCN expression, we selected 22 samples, with equal levels of MYCN, to determine the two groups of 11 samples showing a significant differential expression of ALK as shown in Figure 1 and Supplementary Figure 2.

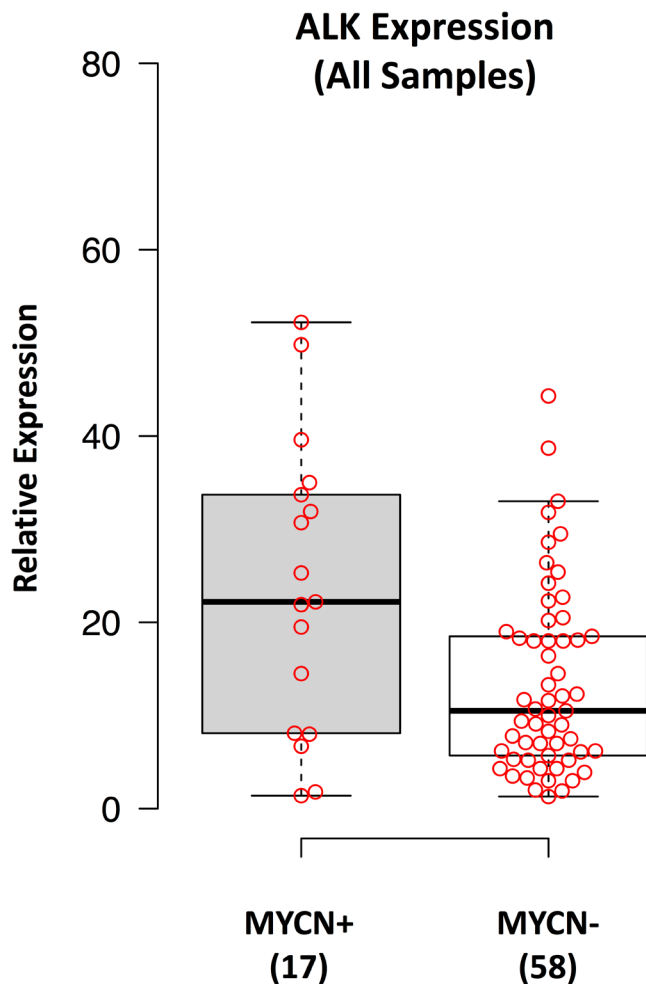

**Supplementary Figure 4: ALK expression in NB tumor samples.** *ALK* mRNA expression was performed by qPCR and data box-plotted using BoxPlotR. Numbers in the Y-axis represents the fold change in expression with respect to the less expressed sample, which was set as 1.

## miRNAs Expression in NB Cell Lines

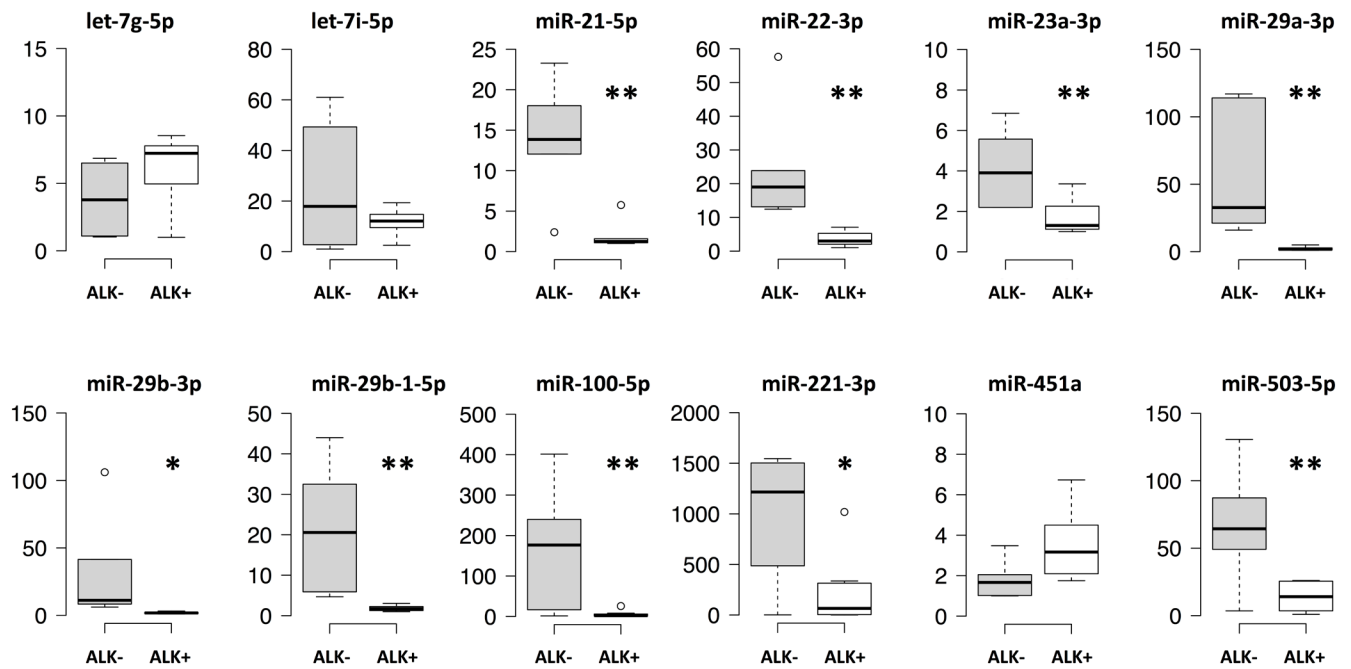

**Supplementary Figure 5: Validation of candidate miRNAs in NB cell lines.** Validation analysis of miRNAs expression was performed by qPCR and data were box-plotted using BoxPlotR. p-value < 0.05 (\*); p-value < 0.01 (\*\*).

miRNAs Expression in NB Tumor Samples

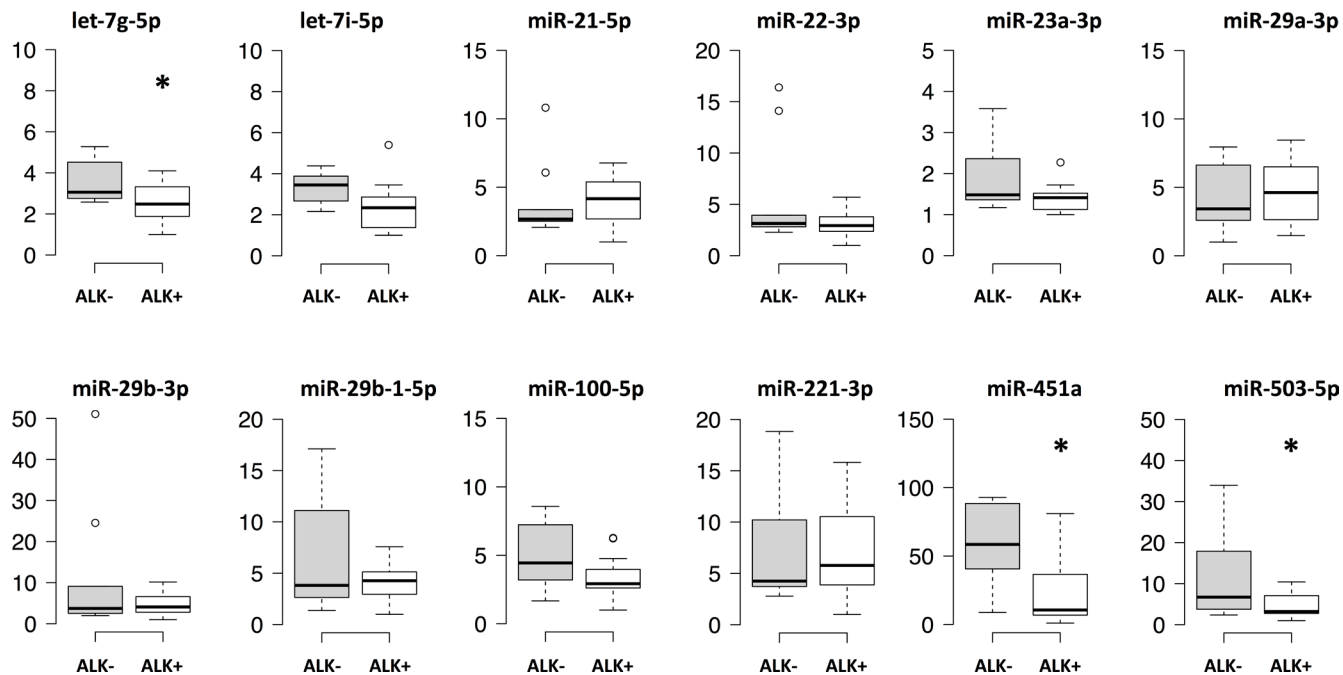

**Supplementary Figure 6: Validation of candidate miRNAs in NB tumor samples.** Validation analysis of miRNAs expression was performed by qPCR and data were box-plotted using BoxPlotR. p-value < 0.05 (\*); p-value < 0.01 (\*\*).

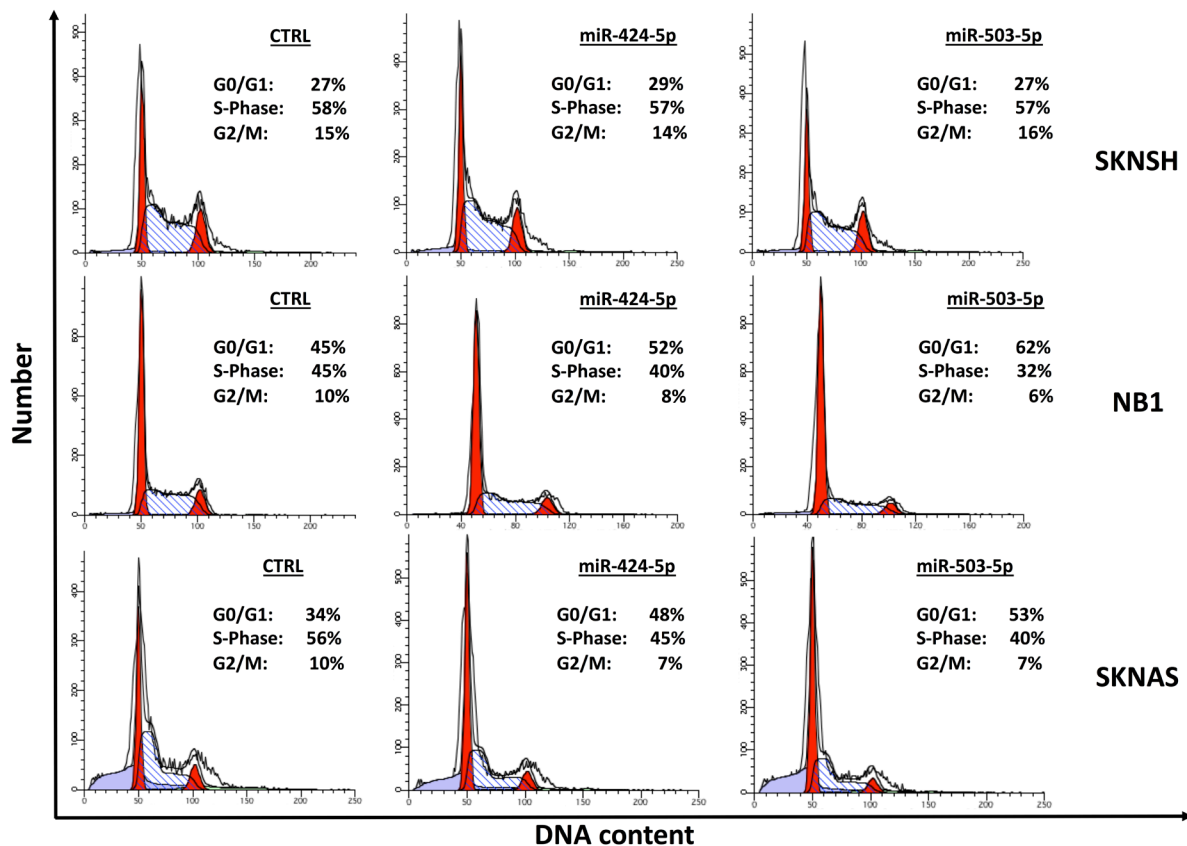

**Supplementary Figure 7: Cell cycle DNA profile of ALK+ and ALK- NB cell lines.** Cell cycle profiles were analyzed 48 hours after transfection. Untreated cells transfected with AllStars Negative Control siRNA (Qiagen), which has no homology to any known mammalian gene, were used as controls. The distribution and percentage of cells in G0/G1, S and G2/M phase of the cell cycle are indicated.

Supplementary Table 1: Cell lines information

| Cell line | Origin        | Tumor | MYCN Status |
|-----------|---------------|-------|-------------|
| ACN       | BBCF          | NB    | NA          |
| GICAN     | BBCF          | NB    | NA          |
| GILIN     | BBCF          | NB    | A           |
| GIMEN     | BBCF          | NB    | NA          |
| IMR32     | BBCF          | NB    | A           |
| IMR5      | BBCF          | NB    | A           |
| KELLY     | ECACC         | NB    | A           |
| LA1-5S    | ECACC         | NB    | A           |
| LAN1      | ECACC         | NB    | A           |
| LAN5      | BBCF          | NB    | A           |
| NB1       | R. Luksch Lab | NB    | NA          |
| SH-SY5Y   | BBCF          | NB    | NA          |
| SKNAS     | BBCF          | NB    | NA          |
| SKNBE2    | BBCF          | NB    | A           |
| SKNBE2(C) | BBCF          | NB    | A           |
| SKNSH     | BBCF          | NB    | NA          |
| UKF-NB3   | R. Luksch Lab | NB    | A           |

BBCF: Biological Bank and Cell Factory, Core Facility of the IRCCS AOU San Martino-IST in Genoa ([www.iclc.it](http://www.iclc.it)); ECACC: European Collection of Cell Cultures ([www.phe-culturecollections.org.uk/collections/ecacc.aspx](http://www.phe-culturecollections.org.uk/collections/ecacc.aspx)).

A: Amplified; NA: Not Amplified.



Supplementary Table 2: NB samples information

| NB sample ID | INSS Stage | Age at diagnosis (months) | Histology | MYCN Status | ALK mRNA expression |
|--------------|------------|---------------------------|-----------|-------------|---------------------|
| 2200         | 4          | 165                       | NB        | NA          | High                |
| 2212         | 4          | 34                        | NB        | NA          | High                |
| 2221         | 1          | 2                         | NB        | NA          | Low                 |
| 2230         | 4          | 49                        | GNB       | NA          | High                |
| 2240         | 3          | 10                        | NB        | NA          | High                |
| 2243         | 1          | 3                         | NB        | NA          | Low                 |
| 2265         | 1          | 1                         | NB        | NA          | Low                 |
| 2271         | 3          | 6                         | NB        | NA          | High                |
| 2347         | 3          | 4                         | NB        | NA          | Low                 |
| 2368         | 4          | 75                        | NB        | NA          | High                |
| 2503         | 3          | 9                         | NB        | NA          | Low                 |
| 2616         | 3          | 43                        | NB        | NA          | Low                 |
| 2624         | 2          | 9                         | NB        | NA          | Low                 |
| 2653         | 3          | 5                         | NB        | NA          | High                |
| 2674         | 4          | 39                        | NB        | NA          | Low                 |
| 2716         | 3          | 2                         | NB        | NA          | High                |
| 2731         | 4          | 26                        | NB        | NA          | Low                 |
| 2841         | 4          | 16                        | NB        | NA          | High                |
| 2854         | 4          | 51                        | NB        | NA          | High                |
| 2916         | 1          | 2                         | NB        | NA          | Low                 |
| 2968         | 2          | 16                        | NB        | NA          | High                |
| 2996         | 2          | 17                        | NB        | NA          | Low                 |

22 tumor samples were employed for miRNA screening and referred to the Gaslini Children's Hospital. All analyses were performed according to the Helsinki declaration. INSS: International Neuroblastoma Staging System); NB: Neuroblastoma; GNB: Ganglioneuroblastoma; NA: Not Amplified.

**Supplementary Table 3: Quality control feature filtering used in the analysis**

| Criteria         | Value    | Criteria meaning                                                                                                                                                                                                                                                                                                                           |
|------------------|----------|--------------------------------------------------------------------------------------------------------------------------------------------------------------------------------------------------------------------------------------------------------------------------------------------------------------------------------------------|
| ControlType      | =0       | Spot is not a Control type                                                                                                                                                                                                                                                                                                                 |
| IsManualFlag     | =0       | Spot has not been flagged manually as a bad quality spot                                                                                                                                                                                                                                                                                   |
| gBGSubSignal     | $\geq 0$ | $gBGSubSignal = gMeanSignal - gBGUsed$ ) means that the Background-subtracted signal is larger or equal to zero                                                                                                                                                                                                                            |
| gIsFeatPopnOL    | =0       | Feature is not a Population Outlier Probes with replicate features on a microarray are examined using population statistics. A feature is a population outlier if its signal is less than a lower threshold or exceeds an upper threshold determined using a multiplier (1.42) times the interquartile range (i.e., IQR) of the population |
| gIsBGPopnOL      | =0       | Background of the feature is not a Population Outlier (same concept as above for the background)                                                                                                                                                                                                                                           |
| gIsFeatNonUnifOL | =0       | Feature is not a non-uniformity outlier in $g(r)$ . A feature is non-uniform if the pixel noise of feature exceeds a threshold established for a "uniform" feature                                                                                                                                                                         |
| gIsBGNonUnifOL   | =0       | Local background is not a non-uniformity outlier in $g(r)$ (same concept as above for the background)                                                                                                                                                                                                                                      |
| gIsSaturated     | =0       | Feature is not saturated. A feature is saturated if 50% of the pixels in a feature are above the saturation threshold                                                                                                                                                                                                                      |

Detected spots are those satisfying the criteria detailed in the table.

**Supplementary Table 4: MIQE checklist**

See Supplementary File 1
